# Supplementary material
Source: publisher figshare collection journal article supplement (https://karger.figshare.com/ndownloader/files/31558472)
Supplement: Supplementary file 1 [file 31558472]

**Supplemental figures**

**Figure S1: Increasing resistance to antituberculosis agents**

Legend: The top panel is showing pubmed search results for “tuberculosis” (orange line) and “tuberculosis drug resistance” (green line) from 1940 to 2020. The scientific interest in tuberculosis has increased in recent years. In the last 5 years in excess of 1 in 10 articles including tuberculosis mentions drug resistance. The bottom panel shows the prevalence of rifampicin resistant tuberculosis in 2020 [94].

**Figure S2: Example of available phage product**

Legend. Commercially available phage products come in a form familiar to clinicians, such as this broad-spectrum antimicrobial phage cocktail active against strains of *Staphylococcus, Streptococcus, Escherichia coli, Pseudomonas aeruginosa* and other diverse bacteria from the Eliava Institute, Tbilisi, Georgia. (*https://bacteriophagepharmacy.com/products/)*

**Figure S3: The Perfect Predator**

Legend: The book cover (left) and a portrait of the authors (with permission).

https://theperfectpredator.com/the-book/
